# Supplementary material for: Metabolomics of Early Stage Plant Cell–Microbe Interaction Using Stable Isotope Labeling
Source: PubMed Central journal article supplement (PMC5996122; doi:10.3389/fpls.2018.00760), 2018-06-05
Supplement: Table_2.pdf [file Table_2.pdf]

Supplemental Table 2. MRM transitions for light/heavy metabolites pairs.

| No.                  | Name                                                            | Formula                                                                                             | MW     | Q1    | Q3    | Structure                                                                             | Fragmentation                                                                                                                                                                                               |
|----------------------|-----------------------------------------------------------------|-----------------------------------------------------------------------------------------------------|--------|-------|-------|---------------------------------------------------------------------------------------|-------------------------------------------------------------------------------------------------------------------------------------------------------------------------------------------------------------|
| <b>Negative mode</b> |                                                                 |                                                                                                     |        |       |       |                                                                                       |                                                                                                                                                                                                             |
| 1                    | Malonic acid                                                    | C <sub>3</sub> H <sub>4</sub> O <sub>4</sub>                                                        | 104.06 | 103   | 59.2  | 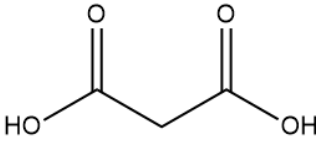   | Chemical Formula: C <sub>2</sub> H <sub>3</sub> O <sub>2</sub> <sup>-</sup><br>Exact Mass: 59.01                                                                                                            |
|                      |                                                                 |                                                                                                     |        | 106   | 61.2  |                                                                                       | <br>Chemical Formula: CHO <sub>2</sub> <sup>-</sup><br>Exact Mass: 45.00                                                 |
| 2                    | GTP<br>(Guanosine<br>5'-triphosphate<br>sodium salt<br>hydrate) | C <sub>10</sub> H <sub>16</sub> N <sub>5</sub> O <sub>14</sub><br>P <sub>3</sub> · xNa <sup>+</sup> | 523.18 | 522.3 | 158.9 |     | Chemical Formula: C <sub>10</sub> H <sub>12</sub> N <sub>5</sub> O <sub>8</sub> P <sup>-</sup><br>Exact Mass: 361.04<br>Chemical Formula: O <sub>6</sub> P <sub>2</sub> <sup>-3</sup><br>Exact Mass: 157.92 |
|                      |                                                                 |                                                                                                     |        | 537.3 | 158.9 |                                                                                       |                                                                                                                                                                                                             |
| 3                    | Glucose                                                         | C <sub>6</sub> H <sub>12</sub> O <sub>6</sub>                                                       | 180.16 | 179.0 | 59.1  |   | Chemical Formula: C <sub>2</sub> H <sub>3</sub> O <sub>2</sub> <sup>-</sup><br>Exact Mass: 59.01                                                                                                            |
|                      |                                                                 |                                                                                                     |        | 185.0 | 61.1  |                                                                                       | <br>Chemical Formula: C <sub>4</sub> H <sub>9</sub> O <sub>4</sub> <sup>-</sup><br>Exact Mass: 121.05                   |
| 4                    | Fumaric acid                                                    | C <sub>4</sub> H <sub>4</sub> O <sub>4</sub>                                                        | 116.07 | 115.1 | 70.9  |  | Chemical Formula: C <sub>3</sub> H <sub>3</sub> O <sub>2</sub> <sup>-</sup><br>Exact Mass: 71.01                                                                                                            |
|                      |                                                                 |                                                                                                     |        | 119.1 | 73.9  |                                                                                       | <br>Chemical Formula: CHO <sub>2</sub> <sup>-</sup><br>Exact Mass: 45.00                                               |

|   |                      |                      |        |       |       |                                                                                       |                                                                                                                                                                                                                                            |
|---|----------------------|----------------------|--------|-------|-------|---------------------------------------------------------------------------------------|--------------------------------------------------------------------------------------------------------------------------------------------------------------------------------------------------------------------------------------------|
| 5 | Ethylmalonic acid    | $C_5H_8O_4$          | 132.11 | 131.1 | 87.1  | 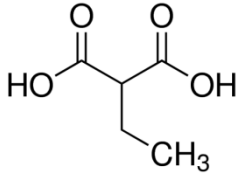   | <p>Chemical Formula: <math>CHO_2^*</math><br/>Exact Mass: 45.00</p>  <p>Chemical Formula: <math>C_4H_7O_2^*</math><br/>Exact Mass: 87.04</p>            |
|   |                      |                      |        | 136.1 | 91.1  |                                                                                       |                                                                                                                                                                                                                                            |
| 6 | L-Dihydroorotic acid | $C_5H_6N_2O_4$       | 158.11 | 157.1 | 112.9 |    | <p>Chemical Formula: <math>C_4H_5N_2O_2^*</math><br/>Exact Mass: 113.04</p>  <p>Chemical Formula: <math>CHO_2^*</math><br/>Exact Mass: 45.00</p>        |
|   |                      |                      |        | 164.1 | 118.9 |                                                                                       |                                                                                                                                                                                                                                            |
| 7 | Pimelic acid         | $C_7H_{12}O_4$       | 160.17 | 159.1 | 96.8  |    | <p>Chemical Formula: <math>CHO_2^*</math><br/>Exact Mass: 45.00</p>  <p>Chemical Formula: <math>C_6H_{10}O_2^*</math><br/>Exact Mass: 98.07</p>         |
|   |                      |                      |        | 166.1 | 102.8 |                                                                                       |                                                                                                                                                                                                                                            |
| 8 | Xanthosine           | $C_{10}H_{12}N_4O_6$ | 284.23 | 283   | 150.9 |  | <p>Chemical Formula: <math>C_5H_3N_4O_2^*</math><br/>Exact Mass: 151.03</p>  <p>Chemical Formula: <math>C_5H_3O_4^*</math><br/>Exact Mass: 133.05</p> |
|   |                      |                      |        | 297   | 159.9 |                                                                                       |                                                                                                                                                                                                                                            |

Positive mode

|    |                     |                |        |      |      |                                                                                       |                                                                                                                                                                                                 |
|----|---------------------|----------------|--------|------|------|---------------------------------------------------------------------------------------|-------------------------------------------------------------------------------------------------------------------------------------------------------------------------------------------------|
| 9  | 1,4-Diaminobutane   | $C_4H_{12}N_2$ | 88.15  | 89.1 | 72   | 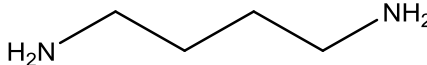   | Chemical Formula: $C_4H_{10}N^+$<br>Exact Mass: 72.08<br><br>Chemical Formula: $H_2N^+$<br>Exact Mass: 16.02 |
|    |                     |                |        | 95.1 | 77   |                                                                                       |                                                                                                                                                                                                 |
| 10 | Sarcosine           | $C_3H_7NO_2$   | 89.09  | 89.9 | 44.1 |    | Chemical Formula: $CHO_2^+$<br>Exact Mass: 45.00<br><br>Chemical Formula: $C_2H_6N^+$<br>Exact Mass: 44.05   |
|    |                     |                |        | 93.9 | 47.1 |                                                                                       |                                                                                                                                                                                                 |
| 11 | Alanine             | $C_3H_7NO_2$   | 89.09  | 90   | 44   |    | Chemical Formula: $CHO_2^+$<br>Exact Mass: 45.00<br><br>Chemical Formula: $C_2H_6N^+$<br>Exact Mass: 44.05   |
|    |                     |                |        | 94   | 47   |                                                                                       |                                                                                                                                                                                                 |
| 12 | N,N-Dimethylglycine | $C_4H_9NO_2$   | 103.12 | 104  | 58.1 |  | Chemical Formula: $CHO_2^+$<br>Exact Mass: 45.00<br><br>Chemical Formula: $C_3H_8N^+$<br>Exact Mass: 58.07 |
|    |                     |                |        | 109  | 62.1 |                                                                                       |                                                                                                                                                                                                 |

|    |               |                 |        |       |     |                                                                                       |                                                                                                                                                                                                                                    |
|----|---------------|-----------------|--------|-------|-----|---------------------------------------------------------------------------------------|------------------------------------------------------------------------------------------------------------------------------------------------------------------------------------------------------------------------------------|
| 13 | Threonine     | $C_4H_9NO_3$    | 119.12 | 120   | 74  | 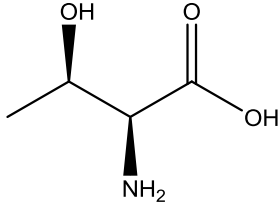   | <p>Chemical Formula: <math>CHO_2^*</math><br/>Exact Mass: 45.00</p>  <p>Chemical Formula: <math>C_3H_8NO^*</math><br/>Exact Mass: 74.06</p>     |
|    |               |                 |        | 125   | 78  |                                                                                       |                                                                                                                                                                                                                                    |
| 14 | Leucine       | $C_6H_{13}NO_2$ | 131.17 | 132   | 86  |    | <p>Chemical Formula: <math>CHO_2^*</math><br/>Exact Mass: 45.00</p>  <p>Chemical Formula: <math>C_5H_{12}N^*</math><br/>Exact Mass: 86.10</p>   |
|    |               |                 |        | 139   | 92  |                                                                                       |                                                                                                                                                                                                                                    |
| 15 | Glutaric acid | $C_5H_8O_4$     | 132.12 | 133.1 | 87  |    | <p>Chemical Formula: <math>C_4H_7O_2^*</math><br/>Exact Mass: 87.04</p>  <p>Chemical Formula: <math>CHO_2^*</math><br/>Exact Mass: 45.00</p>    |
|    |               |                 |        | 138.1 | 91  |                                                                                       |                                                                                                                                                                                                                                    |
| 16 | Histidine     | $C_6H_9N_3O_2$  | 155.15 | 156   | 110 |  | <p>Chemical Formula: <math>CHO_2^*</math><br/>Exact Mass: 45.00</p>  <p>Chemical Formula: <math>C_5H_8N_3^*</math><br/>Exact Mass: 110.07</p> |
|    |               |                 |        | 165   | 118 |                                                                                       |                                                                                                                                                                                                                                    |

|    |              |                   |        |       |       |                                                                                       |                                                                                                                                                                                                                                        |
|----|--------------|-------------------|--------|-------|-------|---------------------------------------------------------------------------------------|----------------------------------------------------------------------------------------------------------------------------------------------------------------------------------------------------------------------------------------|
| 17 | Arginine     | $C_6H_{14}N_4O_2$ | 174.20 | 175   | 70    | 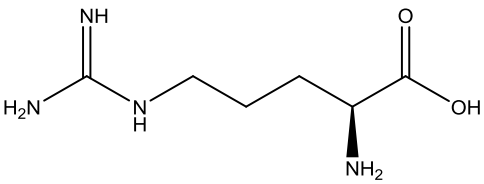    | <p>Chemical Formula: <math>C_2H_6N_3^+</math><br/>Exact Mass: 72.06</p>  <p>Chemical Formula: <math>C_4H_8NO_2^+</math><br/>Exact Mass: 102.06</p>  |
|    |              |                   |        | 185   | 75    |                                                                                       |                                                                                                                                                                                                                                        |
| 18 | L-Citrulline | $C_6H_{13}N_3O_3$ | 175.19 | 176.1 | 70    |    | <p>Chemical Formula: <math>C_4H_8NO_2^+</math><br/>Exact Mass: 102.06</p>  <p>Chemical Formula: <math>C_2H_5N_2O^+</math><br/>Exact Mass: 73.04</p> |
|    |              |                   |        | 185.1 | 74    |                                                                                       |                                                                                                                                                                                                                                        |
| 19 | D-Mannitol   | $C_6H_{14}O_6$    | 182.17 | 183.1 | 147.1 |    | <p>Chemical Formula: HO<br/>Exact Mass: 17.00</p>  <p>Chemical Formula: <math>C_6H_{12}O_4^{2-}</math><br/>Exact Mass: 148.07</p>                   |
|    |              |                   |        | 189.1 | 153.1 |                                                                                       |                                                                                                                                                                                                                                        |
| 20 | Nicotinamide | $C_6H_6N_2O$      | 122.13 | 123.1 | 79.8  |  | <p>Chemical Formula: <math>CH_2NO^+</math><br/>Exact Mass: 44.01</p>  <p>Chemical Formula: <math>C_5H_4N^+</math><br/>Exact Mass: 78.03</p>       |
|    |              |                   |        | 131.1 | 85.8  |                                                                                       |                                                                                                                                                                                                                                        |

|    |               |                  |        |        |      |                                                                                       |                                                                                                                                                                                                      |
|----|---------------|------------------|--------|--------|------|---------------------------------------------------------------------------------------|------------------------------------------------------------------------------------------------------------------------------------------------------------------------------------------------------|
| 21 | Aspartic Acid | $C_4H_7NO_4$     | 133.10 | 134    | 74   | 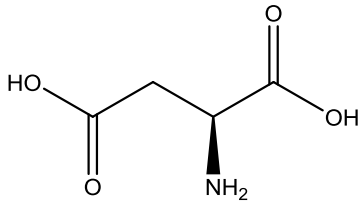   | Chemical Formula: $C_2H_4NO_2^+$<br>Exact Mass: 74.02<br><br>Chemical Formula: $C_2H_3O_2^+$<br>Exact Mass: 59.01 |
|    |               |                  |        | 139    | 77   |                                                                                       |                                                                                                                                                                                                      |
| 22 | Adenine       | $C_5H_5N_5$      | 135.13 | 135.88 | 119  |    | Chemical Formula: $H_2N^+$<br>Exact Mass: 16.02<br><br>Chemical Formula: $C_3H_3N_4^+$<br>Exact Mass: 119.04      |
|    |               |                  |        | 145.88 | 128  |                                                                                       |                                                                                                                                                                                                      |
| 23 | Methionine    | $C_5H_{11}NO_2S$ | 149.05 | 150    | 104  |   | Chemical Formula: $CHO_2^+$<br>Exact Mass: 45.00<br><br>Chemical Formula: $C_4H_{10}NS^+$<br>Exact Mass: 104.05 |
|    |               |                  |        | 156    | 109  |                                                                                       |                                                                                                                                                                                                      |
| 24 | Valine        | $C_5H_{11}NO_2$  | 117.15 | 118    | 71.9 |  | Chemical Formula: $CHO_2^+$<br>Exact Mass: 45.00<br><br>Chemical Formula: $C_4H_{10}N^+$<br>Exact Mass: 73.08   |
|    |               |                  |        |        |      |                                                                                       |                                                                                                                                                                                                      |

|    |                           |                   |        |             |        |                                                                                                                                                   |                                                                                                                                                |
|----|---------------------------|-------------------|--------|-------------|--------|---------------------------------------------------------------------------------------------------------------------------------------------------|------------------------------------------------------------------------------------------------------------------------------------------------|
|    |                           |                   |        | 124         | 76.9   |                                                                                                                                                   |                                                                                                                                                |
| 25 | Pyroglutamic acid         | $C_5H_7NO_3$      | 129.12 | 129.8       | 84     | 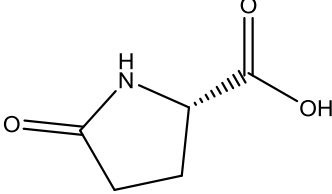                                                               | Chemical Formula: $CHO_2^*$<br>Exact Mass: 45.00                                                                                               |
|    |                           |                   |        | 135.8       | 89     |                                                                                                                                                   | <br>Chemical Formula: $C_4H_6NO^*$<br>Exact Mass: 84.04     |
| 26 | 2,3-Dihydroxybenzoic Acid | $C_7H_6O_4$       | 154.12 | 155.04      | 137.04 |                                                                | <br>Chemical Formula: $HO^*$<br>Exact Mass: 17.00           |
|    |                           |                   |        | 162.04      | 144.04 |                                                                                                                                                   | Chemical Formula: $C_7H_5O_3^*$<br>Exact Mass: 137.02                                                                                          |
| 27 | Phenylalanine             | $C_9H_{11}NO_2$   | 165.19 | 166         | 120    |                                                               | Chemical Formula: $CHO_2^*$<br>Exact Mass: 45.00                                                                                               |
|    |                           |                   |        | 176         | 129    |                                                                                                                                                   | <br>Chemical Formula: $C_8H_{10}N^*$<br>Exact Mass: 120.08 |
| 28 | Uridine                   | $C_9H_{12}N_2O_6$ | 244.2  | 245.06<br>9 | 113    |                                                              | Chemical Formula: $C_5H_6O_4^*$<br>Exact Mass: 133.05                                                                                          |
|    |                           |                   |        |             |        | <br>Chemical Formula: $C_4H_3N_2O_2^*$<br>Exact Mass: 111.02 |                                                                                                                                                |

|    |                              |                      |        |         |       |                                                                                       |                                                                                                                                                |
|----|------------------------------|----------------------|--------|---------|-------|---------------------------------------------------------------------------------------|------------------------------------------------------------------------------------------------------------------------------------------------|
|    |                              |                      |        | 256.069 | 119   |                                                                                       |                                                                                                                                                |
| 29 | 2-Deoxyadenosine             | $C_{10}H_{13}N_5O_3$ | 251.25 | 252.1   | 136.1 | 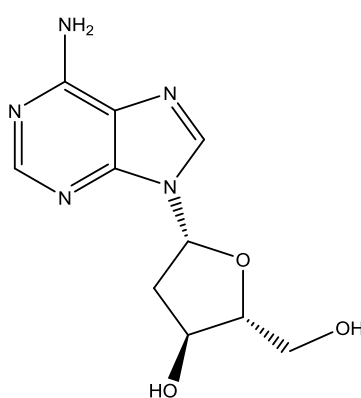   | <br>Chemical Formula: $C_5H_4N_5^+$<br>Exact Mass: 134.05   |
|    |                              |                      |        | 267.1   | 146.1 |                                                                                       |                                                                                                                                                |
| 30 | 2-Deoxyguanosine monohydrate | $C_{10}H_{13}N_5O_4$ | 267.25 | 268.2   | 152.1 |   | <br>Chemical Formula: $C_5H_4N_5O^+$<br>Exact Mass: 150.04  |
|    |                              |                      |        | 283.2   | 162.1 |                                                                                       |                                                                                                                                                |
| 31 | Adenosine                    | $C_{10}H_{13}N_5O_4$ | 267.25 | 268.24  | 136   |  | <br>Chemical Formula: $C_5H_4N_5^+$<br>Exact Mass: 134.05 |

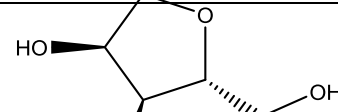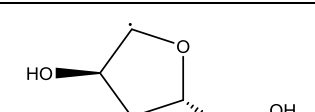



|    |                                |                       |        |        |       |                                                                                                                                                                                                                                                                                                                                                                                    |                                                                                                                                                                                                                                                                                                                                                                                                                                   |
|----|--------------------------------|-----------------------|--------|--------|-------|------------------------------------------------------------------------------------------------------------------------------------------------------------------------------------------------------------------------------------------------------------------------------------------------------------------------------------------------------------------------------------|-----------------------------------------------------------------------------------------------------------------------------------------------------------------------------------------------------------------------------------------------------------------------------------------------------------------------------------------------------------------------------------------------------------------------------------|
|    |                                |                       |        | 283.24 | 146   |                                                                                                                                                                                                                                                                                                                                                                                    |                                                                                                                                                                                                                                                                                                                                                                                                                                   |
| 32 | Guanosine                      | $C_{10}H_{13}N_5O_5$  | 283.24 | 284    | 152   | 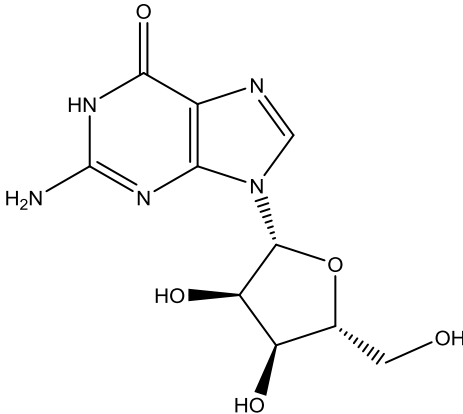 <p>Chemical structure of Guanosine: A guanine base (a fused pyrimidine and imidazole ring system with a carbonyl group and an amino group) attached to a ribose sugar (a five-membered ring with hydroxyl groups at the 2' and 3' positions and a hydroxymethyl group at the 4' position).</p> | <p>Chemical Formula: <math>C_5H_4N_5O^+</math><br/>Exact Mass: 150.04</p>  <p>Chemical structure of Guanosine cation: Similar to Guanosine, but with a positive charge on the nitrogen atom in the imidazole ring.</p> <p>Chemical Formula: <math>C_5H_9O_4^+</math><br/>Exact Mass: 133.05</p>                                                |
|    |                                |                       |        | 299    | 162   |                                                                                                                                                                                                                                                                                                                                                                                    |                                                                                                                                                                                                                                                                                                                                                                                                                                   |
| 33 | 5-Deoxy-5-methylthio-adenosine | $C_{11}H_{15}N_5O_3S$ | 297.33 | 298.1  | 136.1 |  <p>Chemical structure of 5-Deoxy-5-methylthio-adenosine: An adenine base (a fused pyrimidine and imidazole ring system with an amino group) attached to a ribose sugar that has a methylthio group (-S-CH<sub>3</sub>) at the 5' position instead of a hydroxyl group.</p>                   | <p>Chemical Formula: <math>C_5H_4N_5^+</math><br/>Exact Mass: 134.05</p>  <p>Chemical structure of 5-Deoxy-5-methylthio-adenosine cation: Similar to 5-Deoxy-5-methylthio-adenosine, but with a positive charge on the nitrogen atom in the imidazole ring.</p> <p>Chemical Formula: <math>C_6H_{11}O_3S^+</math><br/>Exact Mass: 163.04</p> |

|    |           |                       |        |       |       |                                                                                       |                                                                                                                                                                                                                                                                                                   |
|----|-----------|-----------------------|--------|-------|-------|---------------------------------------------------------------------------------------|---------------------------------------------------------------------------------------------------------------------------------------------------------------------------------------------------------------------------------------------------------------------------------------------------|
|    |           |                       |        | 314.1 | 146.1 |                                                                                       |                                                                                                                                                                                                                                                                                                   |
| 34 | Allantoin | $C_4H_6N_4O_3$        | 158.12 | 159.1 | 116.2 | 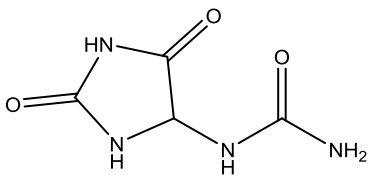   | <br>Chemical Formula: $C_3H_4N_3O_2^*$<br>Exact Mass: 114.03                                                                                                                                                   |
|    |           |                       |        | 167.1 | 122.2 |                                                                                       |                                                                                                                                                                                                                                                                                                   |
| 35 | AMP       | $C_{10}H_{14}N_5O_7P$ | 347.22 | 348.4 | 135.9 |   | Chemical Formula: $C_5H_4N_5^*$<br>Exact Mass: 134.05<br><br><br>Chemical Formula: $C_5H_{10}O_7P^*$<br>Exact Mass: 213.02 |
|    |           |                       |        | 363.4 | 145.9 |                                                                                       |                                                                                                                                                                                                                                                                                                   |
| 36 | Proline   | $C_5H_9NO_2$          | 115.13 | 116   | 70    |  | Chemical Formula: $CHO_2^*$<br>Exact Mass: 45.00<br><br>Chemical Formula: $C_4H_8N^*$<br>Exact Mass: 70.07                                                                                                   |
|    |           |                       |        | 122   | 75    |                                                                                       |                                                                                                                                                                                                                                                                                                   |

|    |                |                   |        |       |       |                                                                                     |                                                                                                                                                                                                                                     |
|----|----------------|-------------------|--------|-------|-------|-------------------------------------------------------------------------------------|-------------------------------------------------------------------------------------------------------------------------------------------------------------------------------------------------------------------------------------|
| 37 | Serine         | $C_3H_7NO_3$      | 105.09 | 105.9 | 59.8  | 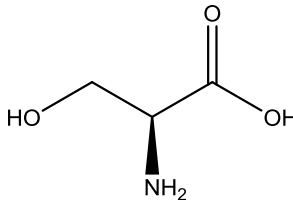 | <p>Chemical Formula: <math>CHO_2^*</math><br/>Exact Mass: 45.00</p>  <p>Chemical Formula: <math>C_2H_6NO^*</math><br/>Exact Mass: 60.04</p>      |
|    |                |                   |        | 109.9 | 62.8  |                                                                                     |                                                                                                                                                                                                                                     |
| 38 | Asparagine     | $C_4H_8N_2O_3$    | 132.12 | 133   | 74    |  | <p>Chemical Formula: <math>C_2H_4NO_2^*</math><br/>Exact Mass: 74.02</p>  <p>Chemical Formula: <math>C_2H_4NO^*</math><br/>Exact Mass: 58.03</p> |
|    |                |                   |        | 139   | 77    |                                                                                     |                                                                                                                                                                                                                                     |
| 39 | Sinapinic acid | $C_{11}H_{12}O_5$ | 224.21 | 225.2 | 206.9 |  | <p>Chemical Formula: <math>HO^*</math><br/>Exact Mass: 17.00</p>  <p>Chemical Formula: <math>C_{11}H_{11}O_4^*</math><br/>Exact Mass: 207.07</p> |
|    |                |                   |        | 236.2 | 217.9 |                                                                                     |                                                                                                                                                                                                                                     |
